# Supplementary material
Source: publisher figshare collection journal article supplement (https://frontiersin.figshare.com/ndownloader/files/28321737)
Supplement: Supplementary file [file 28321737]

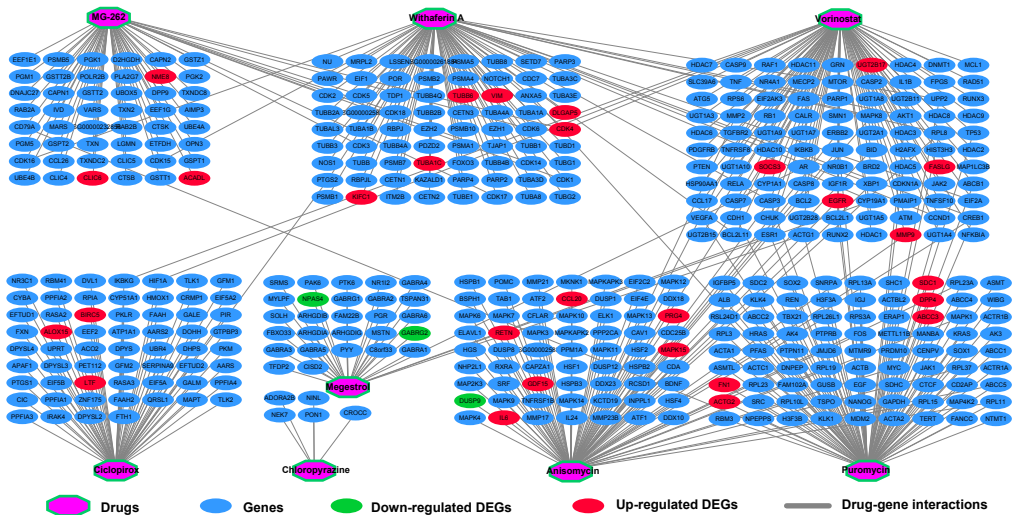

**Figure S4.** The drugs-genes interaction network of the targeted therapeutic drugs of snoRNAs prognostic signature.
